# Supplementary material
Source: Springer Nature journal article supplement (https://www.springermedizin.de/resource/supplementary/12880_2013_190_MOESM5_ESM.pdf/9450190)

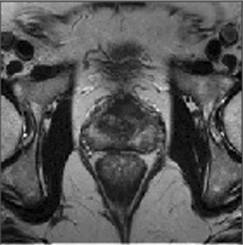

(a)

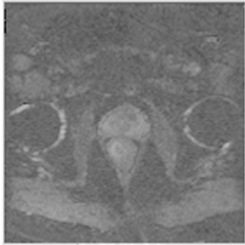

(b)

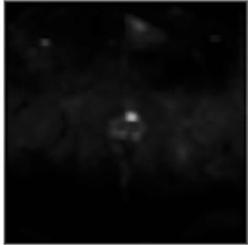

(c)

Supplement: MOESM5 [file 9450190]
